# Supplementary material for: Fabrication of nanoscale core–shell structured lead azide/porous carbon based on a metal–organic framework with high safety performance
Source: Royal Society of Chemistry journal article supplement (doi:10.1039/d1nj06060k), 2022-01-01
Supplement: d1nj06060k1.pdf [file d1nj06060k1.pdf]

## Supporting Information

# Fabrication of Nanoscale Core-shell Structure Lead Azide/Porous Carbon Based on Metal-Organic Framework with High Safety Performance

*Zhenzhan Yan<sup>a</sup>, Li Yang<sup>\*a</sup>, Wenchao Tong<sup>a</sup>, and Jimin Han<sup>a</sup>*

Prof. L. Yang

<sup>†</sup>State Key Laboratory of Explosion Science and Technology, Beijing Institute of Technology,  
Beijing, 100081, P.R. China

E-mail: yanglibit@bit.edu.cn

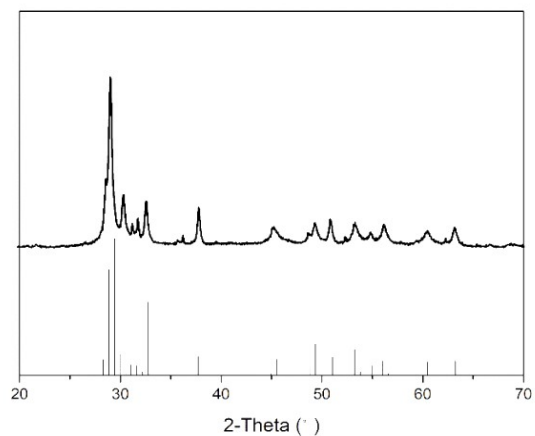

Fig S1 Comparison of PbO/C XRD curve and PbO standard XRD card

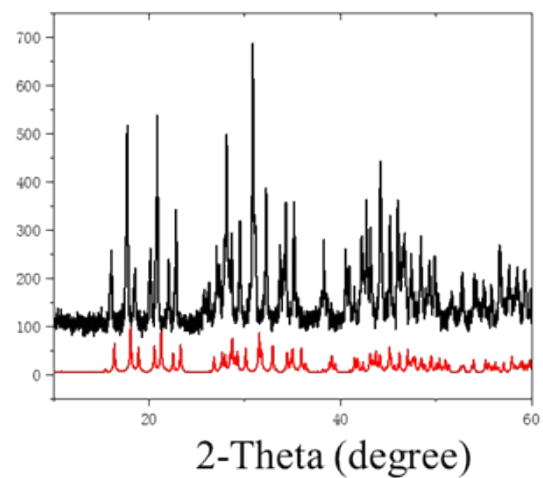

Fig S2 Comparison of LA/C XRD curve and  $\alpha$ -LA standard XRD card

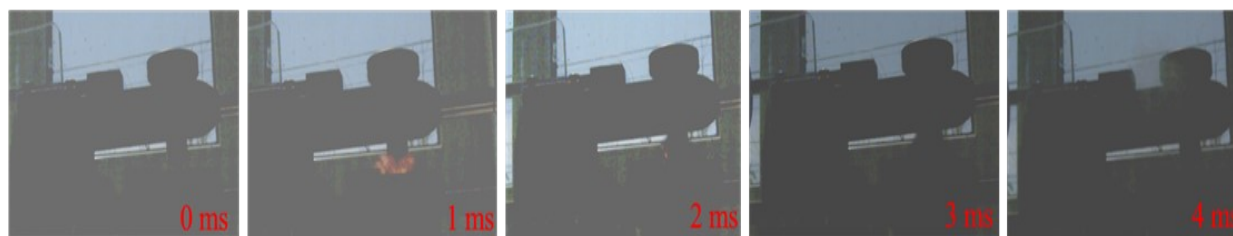

Fig S3 High-speed photographs of LA/C detonating under friction conditions.
